# Supplementary material for: Natural variation in wild tomato trichomes; selecting metabolites that contribute to insect resistance using a random forest approach
Source: PubMed Central journal article supplement (PMC8252294; doi:10.1186/s12870-021-03070-x), 2021-07-02
Supplement: 12870_2021_3070_MOESM3_ESM.pdf [file 12870_2021_3070_MOESM3_ESM.pdf]

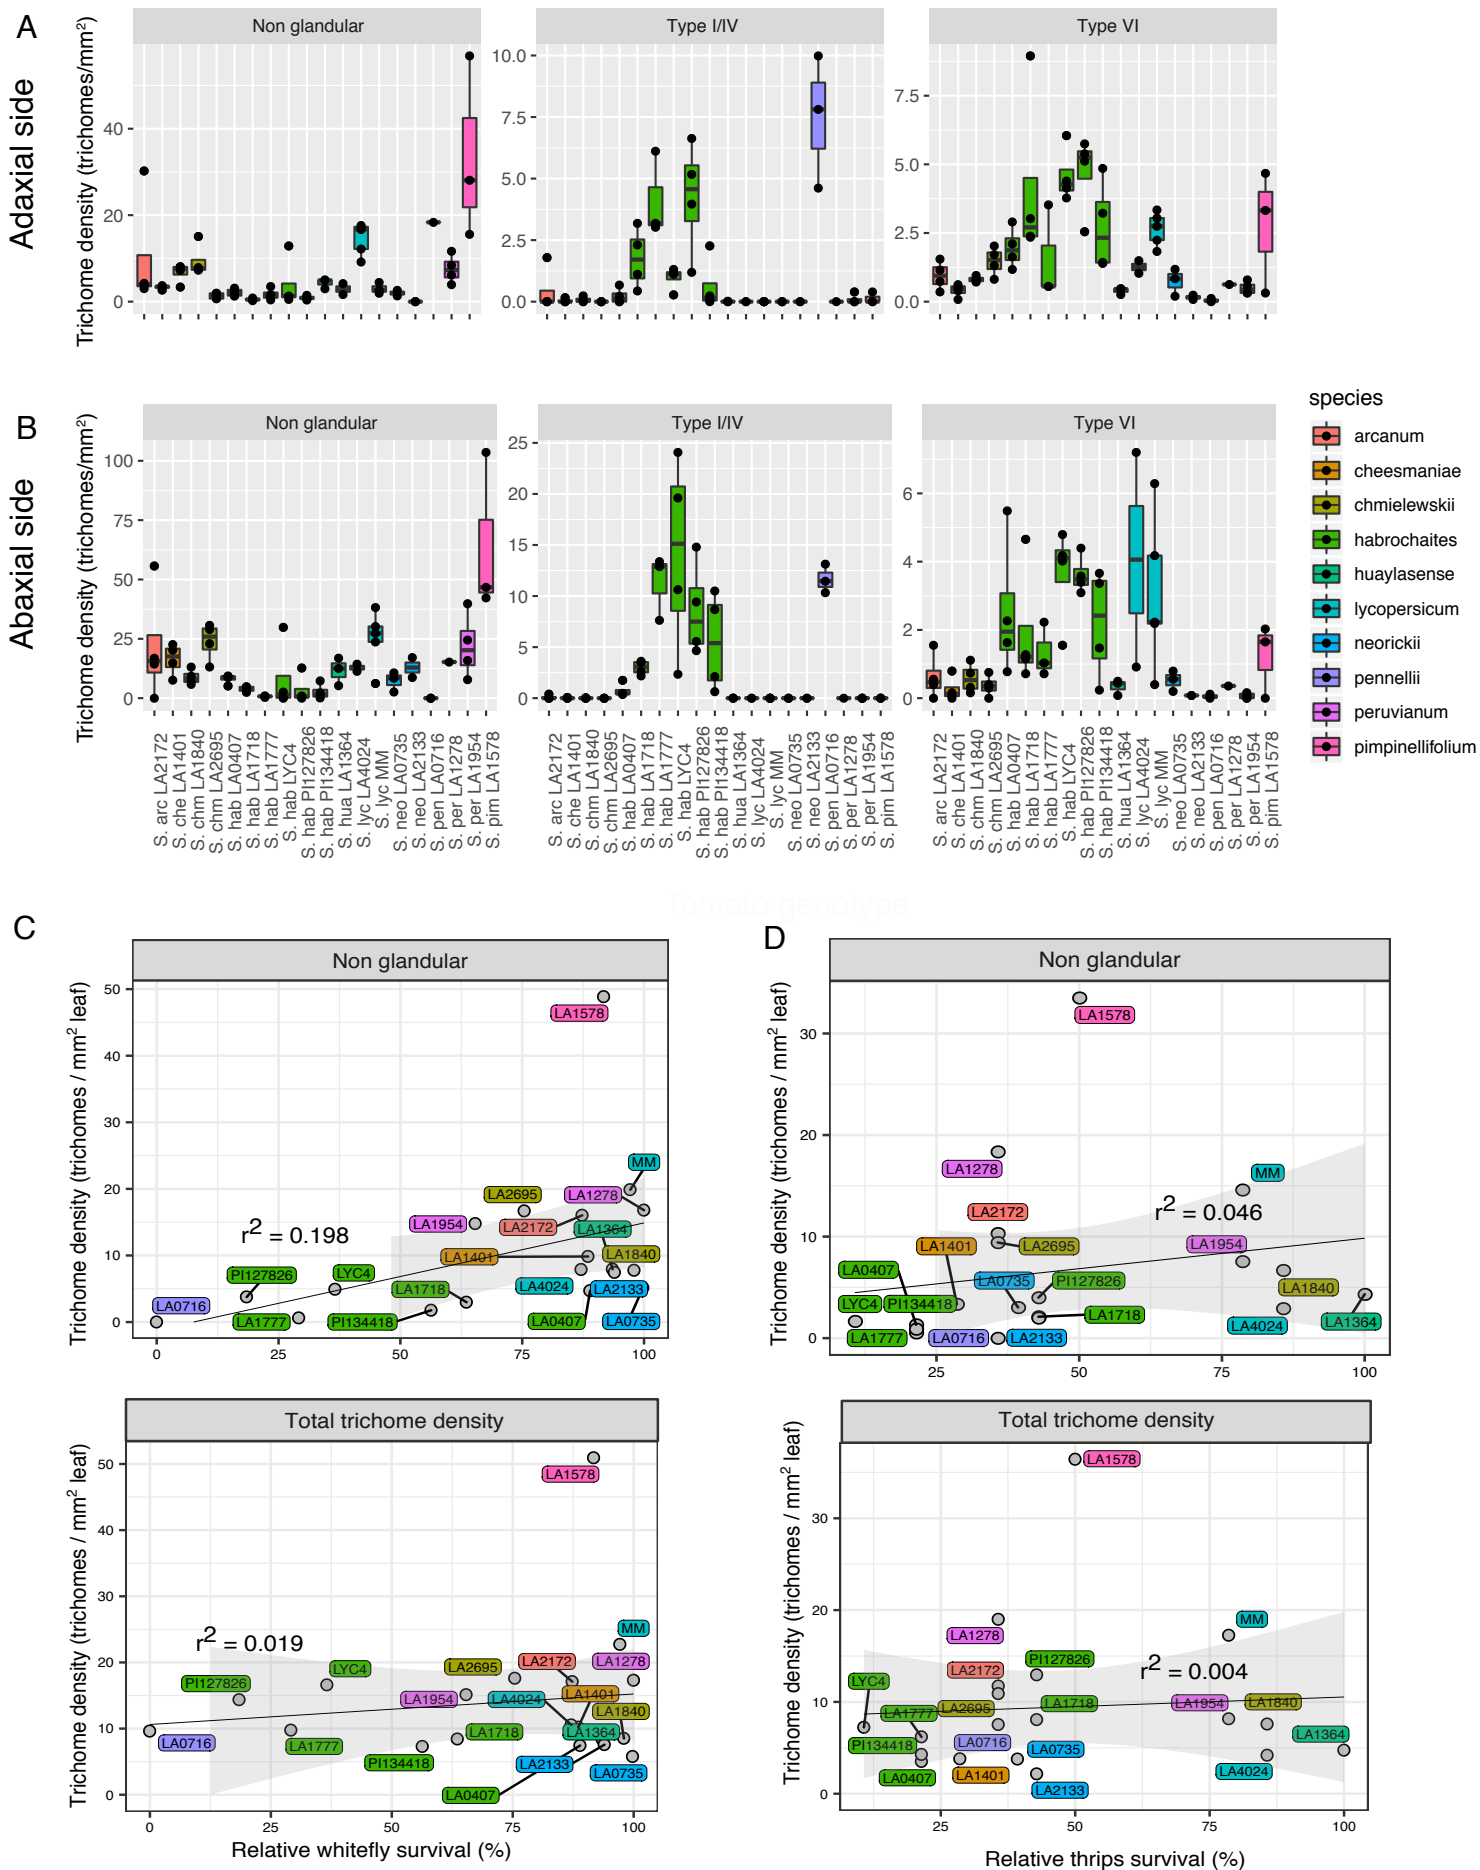

**Additional file: Figure S3.** Densities of non-glandular, type-I/IV and type-VI trichomes on the leaf surface. The data supports Fig. 2 of the main text. **(A)** shows the densities on the adaxial side while the abaxial side is given in **(B)**. Datapoints indicated by the black dots display the average density of two leaflets of one plant ( $n = 3-5$ ). **(C-D)** Average non-glandular (top panel) and the average of the summed trichome types (bottom panel) versus the relative survival of whiteflies **(C)** and thrips **(D)**. The densities of **(C)** includes both abaxial and adaxial surface, while **(D)** only includes densities on the adaxial surface. Non glandular trichomes consisted of summed types II, III, V and VIII. Accessions are colour-coded by species.
