# Supplementary material for: Natural variation in wild tomato trichomes; selecting metabolites that contribute to insect resistance using a random forest approach
Source: PubMed Central journal article supplement (PMC8252294; doi:10.1186/s12870-021-03070-x), 2021-07-02
Supplement: 12870_2021_3070_MOESM5_ESM.pdf [file 12870_2021_3070_MOESM5_ESM.pdf]

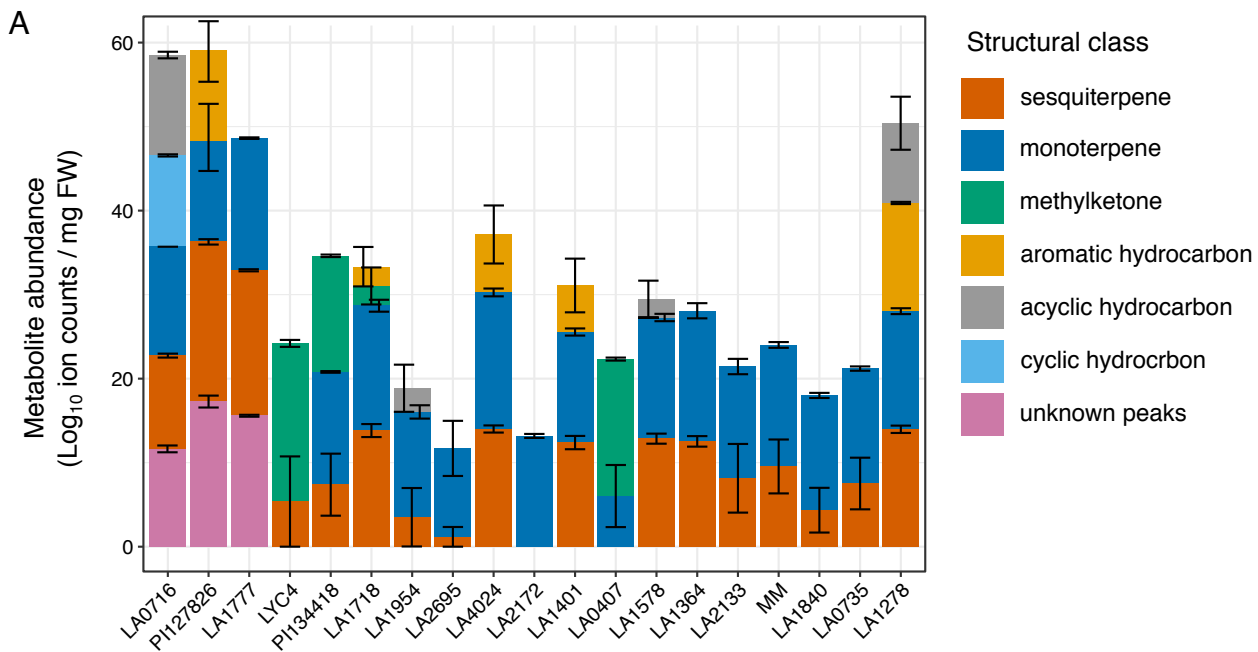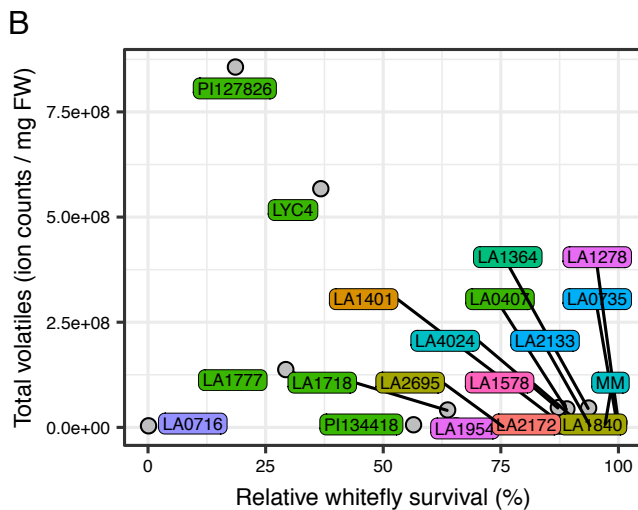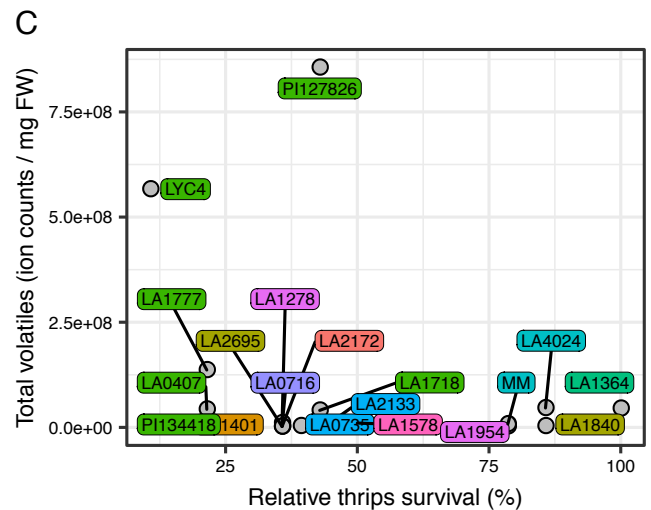

**Additional file 5: Figure S5.** Summed peak areas of the volatile metabolites as detected by GC/MS-TOF. **(A)** Summed peak area of the different structural classes detect over the accessions. The accessions are ordered from a low to high whitefly survival rate. Bars represent the log<sub>10</sub>-transformed mean peak-area of the summed metabolites (quantified by the base-peak of each mass spectrum) categorised to the same structural class  $\pm$  SE over 3-8 biological replicates. Metabolites that could not be matched to an entry in the available libraries are categorised as "unknown peaks". More details about the metabolite identification and categorisation can be found in Additional file: Table S3. **(B)** The averaged total ion counts plotted against whitefly survival rates. **(C)** The averaged total ion counts plotted against thrips survival rates. The figure is supplemental to Figure 3B of the main text.
