# Supplementary material for: Natural variation in wild tomato trichomes; selecting metabolites that contribute to insect resistance using a random forest approach
Source: PubMed Central journal article supplement (PMC8252294; doi:10.1186/s12870-021-03070-x), 2021-07-02
Supplement: 12870_2021_3070_MOESM8_ESM.pdf [file 12870_2021_3070_MOESM8_ESM.pdf]

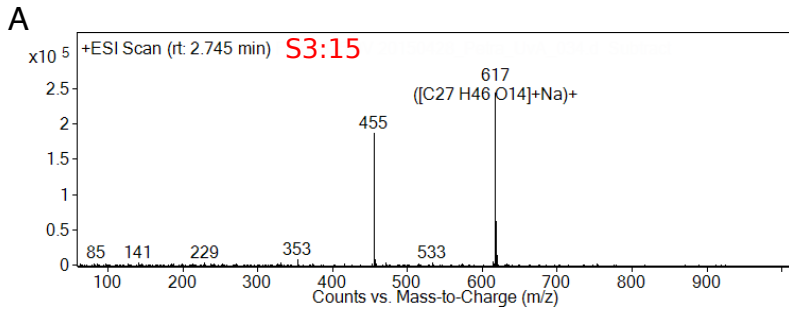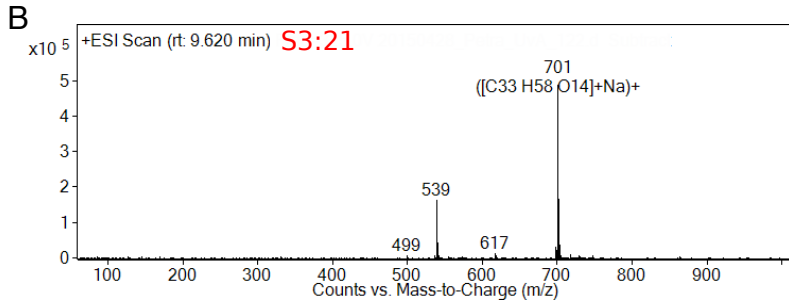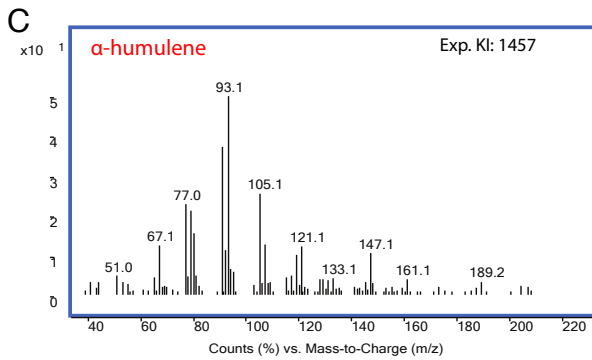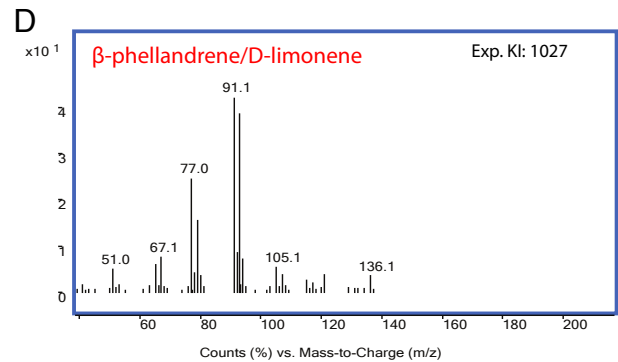

**Additional file 8: Figure S8.** Mass spectra of metabolites with significant feature importances that were not verified using analytical standards. This figure is supplemental to Table 2 of the main text. **(A, B)** Acylsugars as measured by UHPLC-MS in positive mode. **(C-D)** Volatiles as measured by GC/MS-TOF. Metabolite identification is given in red. For the volatiles, the experimental Kovats Retention Index (KI) is given.
